# Supplementary material for: Dolutegravir + Lamivudine vs. Dolutegravir + Tenofovir Disoproxil Fumarate/Emtricitabine: Very-Low-Level HIV-1 Replication through 144 Weeks in the GEMINI-1 and GEMINI-2 Studies
Source: MDPI journal article supplement (doi:10.3390/v16030405), 2024-03-06

**Figure S1.** Time to VL <40 copies/mL and TND status **(A)** overall and **(B-C)** by baseline VL subgroups (observed analysis). All participants with VL <50 copies/mL at Week 144 were included. DTG, dolutegravir; FTC, emtricitabine; NE, not evaluable; 3TC, lamivudine; TDF, tenofovir disoproxil fumarate; TND, target not detected; VL, viral load.

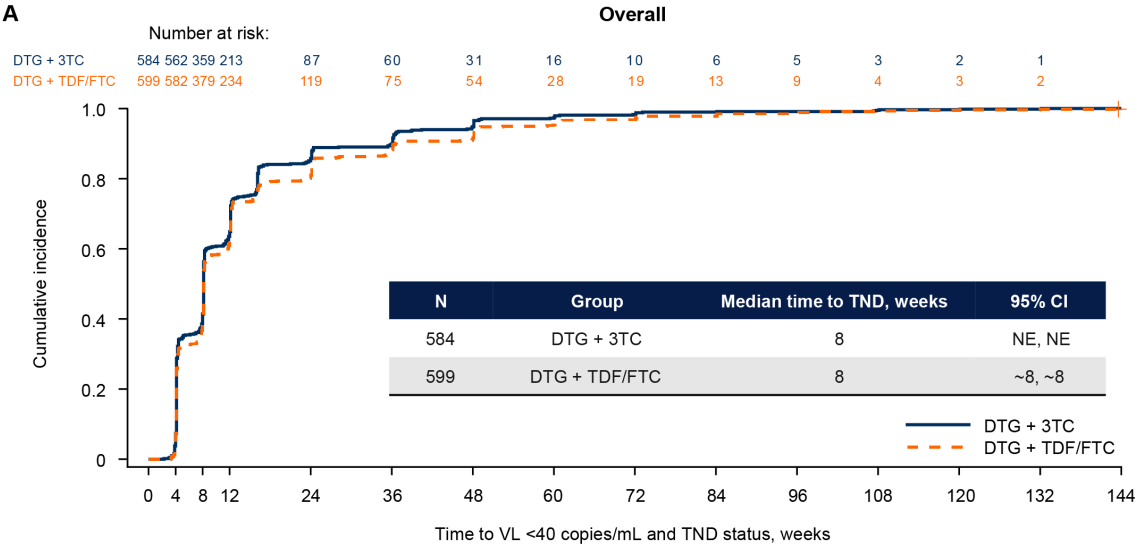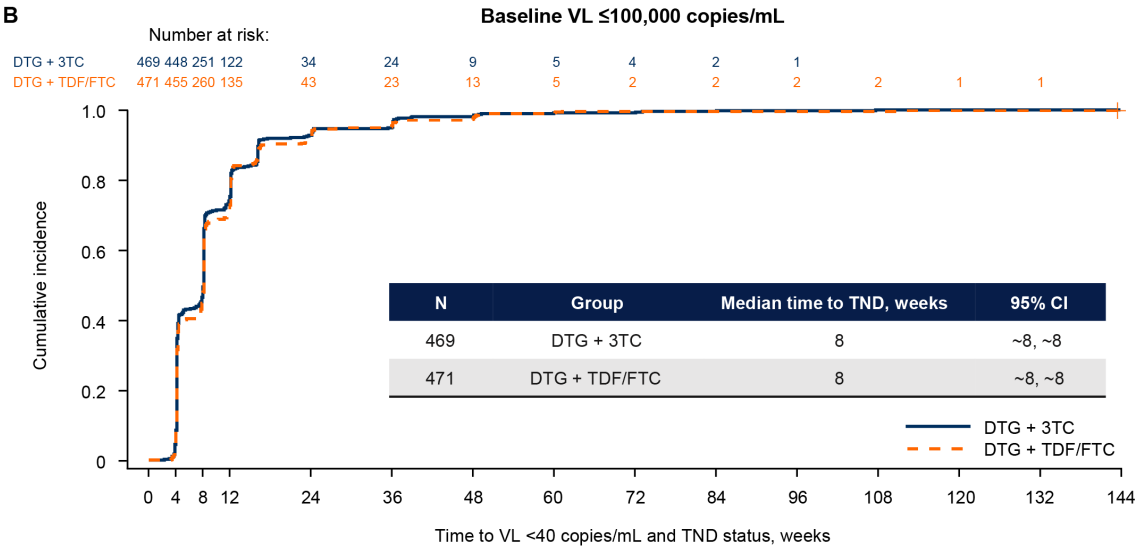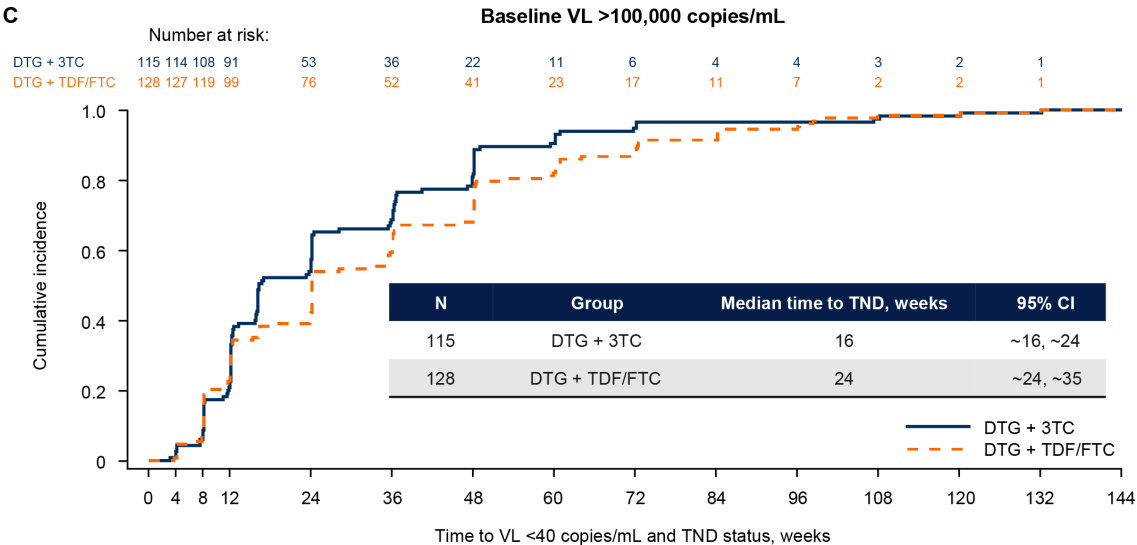

Supplement: s1 [file s1]
